# Supplementary material for: Enhancing Li-ion capacity and rate capability in cation-defective vanadium ferrite aerogels via aluminum substitution
Source: Royal Society of Chemistry journal article supplement (doi:10.1039/d1ra00819f), 2021-01-01
Supplement: d1ra00819f1.pdf [file d1ra00819f1.pdf]

Supplementary Information for:

## **Enhancing Li-ion capacity and rate capability in cation-defective vanadium ferrite aerogels via aluminum substitution**

Christopher N. Chervin,<sup>1</sup> Ryan H. DeBlock,<sup>2</sup> Joseph F. Parker,<sup>1</sup> Bethany M. Hudak,<sup>3</sup> Nathaniel L. Skeeel,<sup>1</sup> Jesse S. Ko,<sup>4</sup> Debra R. Rolison,<sup>1</sup> and Jeffrey W. Long<sup>1†</sup>

<sup>1</sup>*Surface Chemistry Branch, Code 6170, U.S. Naval Research Laboratory, Washington, DC 20375, USA*

<sup>2</sup>*NRC Postdoctoral Associate at the Naval Research Laboratory, Washington, DC 20375, USA*

<sup>3</sup>*Materials & Systems Branch, Code 6360, U.S. Naval Research Laboratory, Washington, DC 20375, USA*

<sup>4</sup>*Former NRC Postdoctoral Associate at the Naval Research Laboratory, Washington, DC 20375, USA*

---

<sup>†</sup> Author to whom correspondence should be addressed. Email: jeffrey.long@nrl.navy.mil

**Fig. S1**

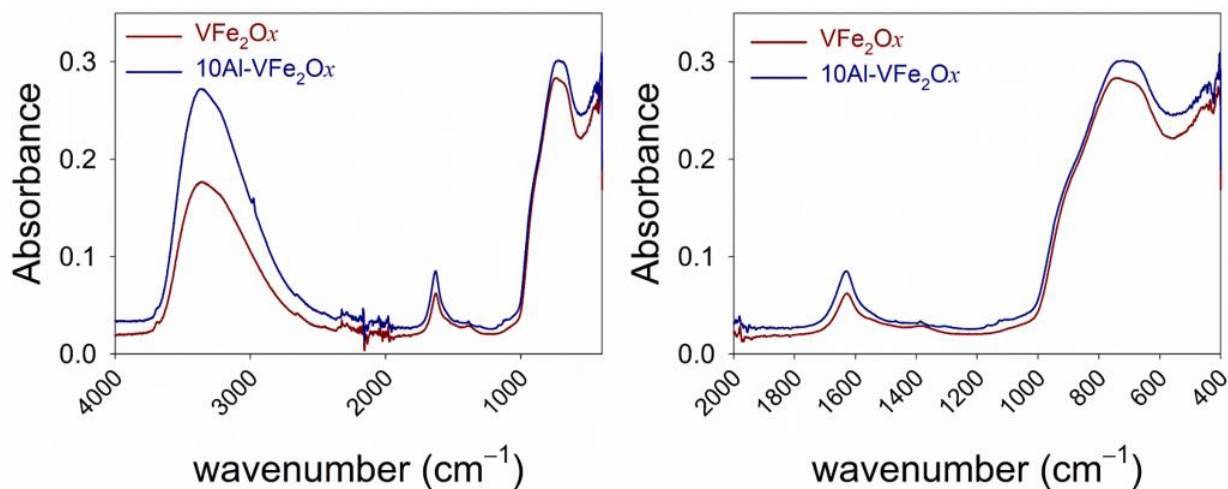

**Fig. S1.** Attenuated total reflectance infrared spectra of VFe<sub>2</sub>O<sub>x</sub> and 10Al-VFe<sub>2</sub>O<sub>x</sub> heated to 300°C in O<sub>2</sub>. Spectra on the left shows the full range and spectra on the right shows the region from 2000 to 400 cm<sup>-1</sup>.

The spectra include a broad band from 3750 to 3000 cm<sup>-1</sup>, typical for adsorbed water, expected because the data are collected in ambient conditions where the high surface-area aerogels readily adsorb atmospheric water. The spectra also show a band centered at ~1630 cm<sup>-1</sup> that correlates with C=O or C=C stretching from residual organic components, a byproduct of the synthesis previously observed in ZrO<sub>x</sub>Hy-based aerogels prepared by the epoxide-initiated method.

**Fig. S2**

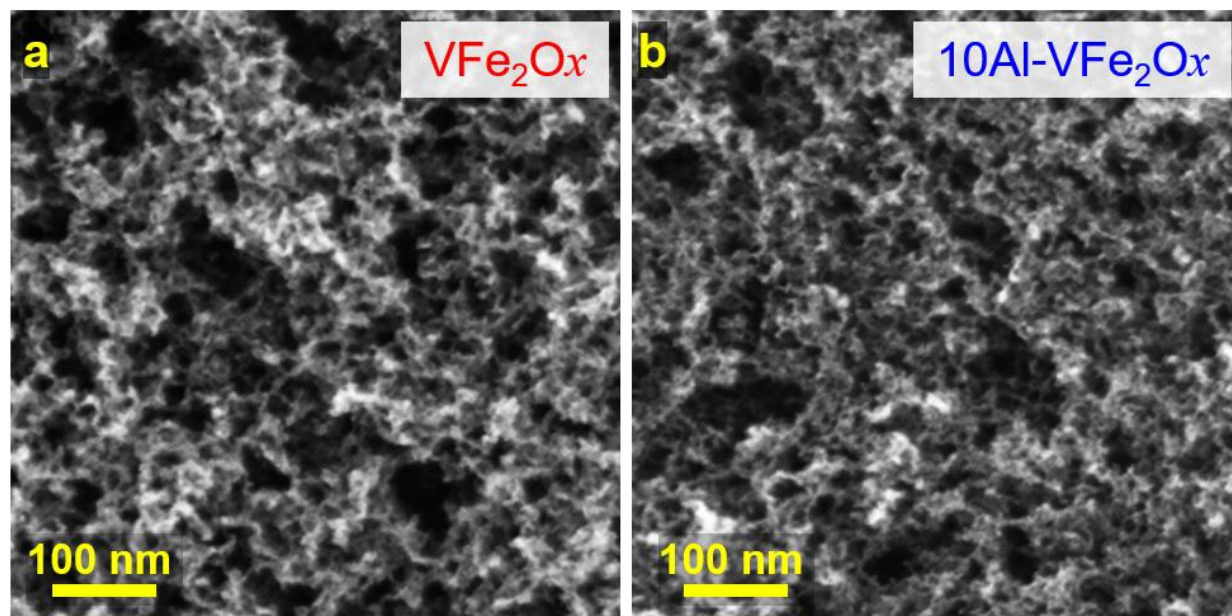

**Fig. S2.** Scanning electron micrographs of (a) VFe<sub>2</sub>O<sub>x</sub> heated to 300°C in O<sub>2</sub> and (b) 10Al-VFe<sub>2</sub>O<sub>x</sub> heated to 300°C in O<sub>2</sub>.

**Fig. S3**

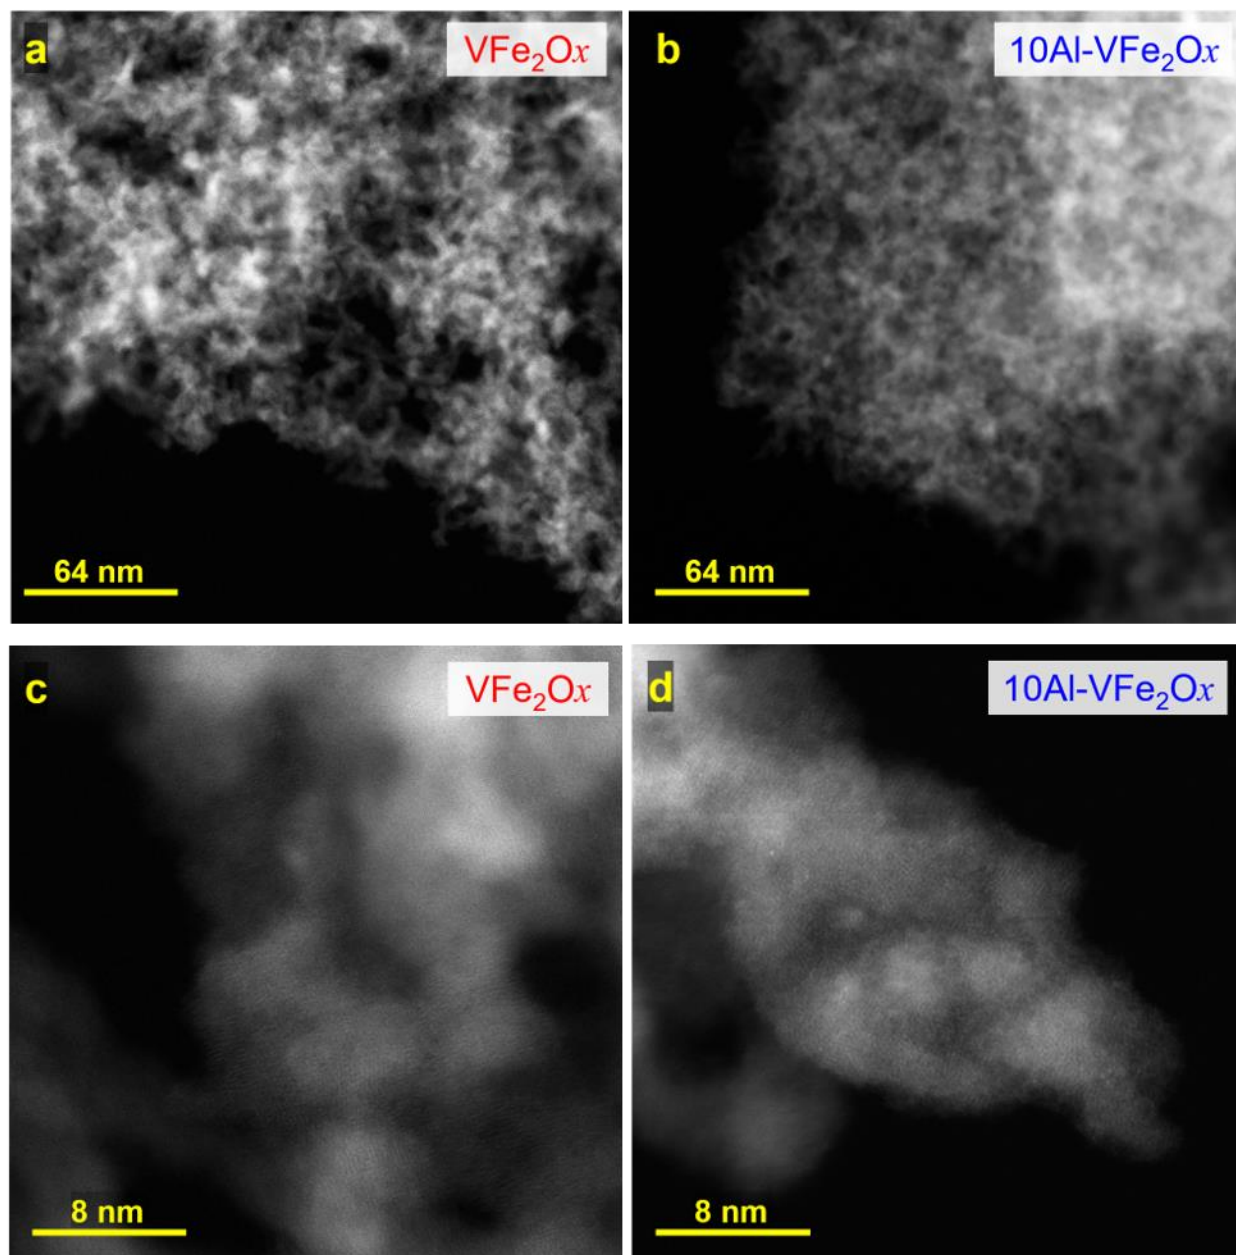

**Fig. S3.** Transmission electron micrograph of (a,c)  $\text{VFe}_2\text{O}_x$  heated to 300°C in  $\text{O}_2$  and (b,d)  $10\text{Al-VFe}_2\text{O}_x$  heated to 300°C in  $\text{O}_2$ .

**Fig. S4**

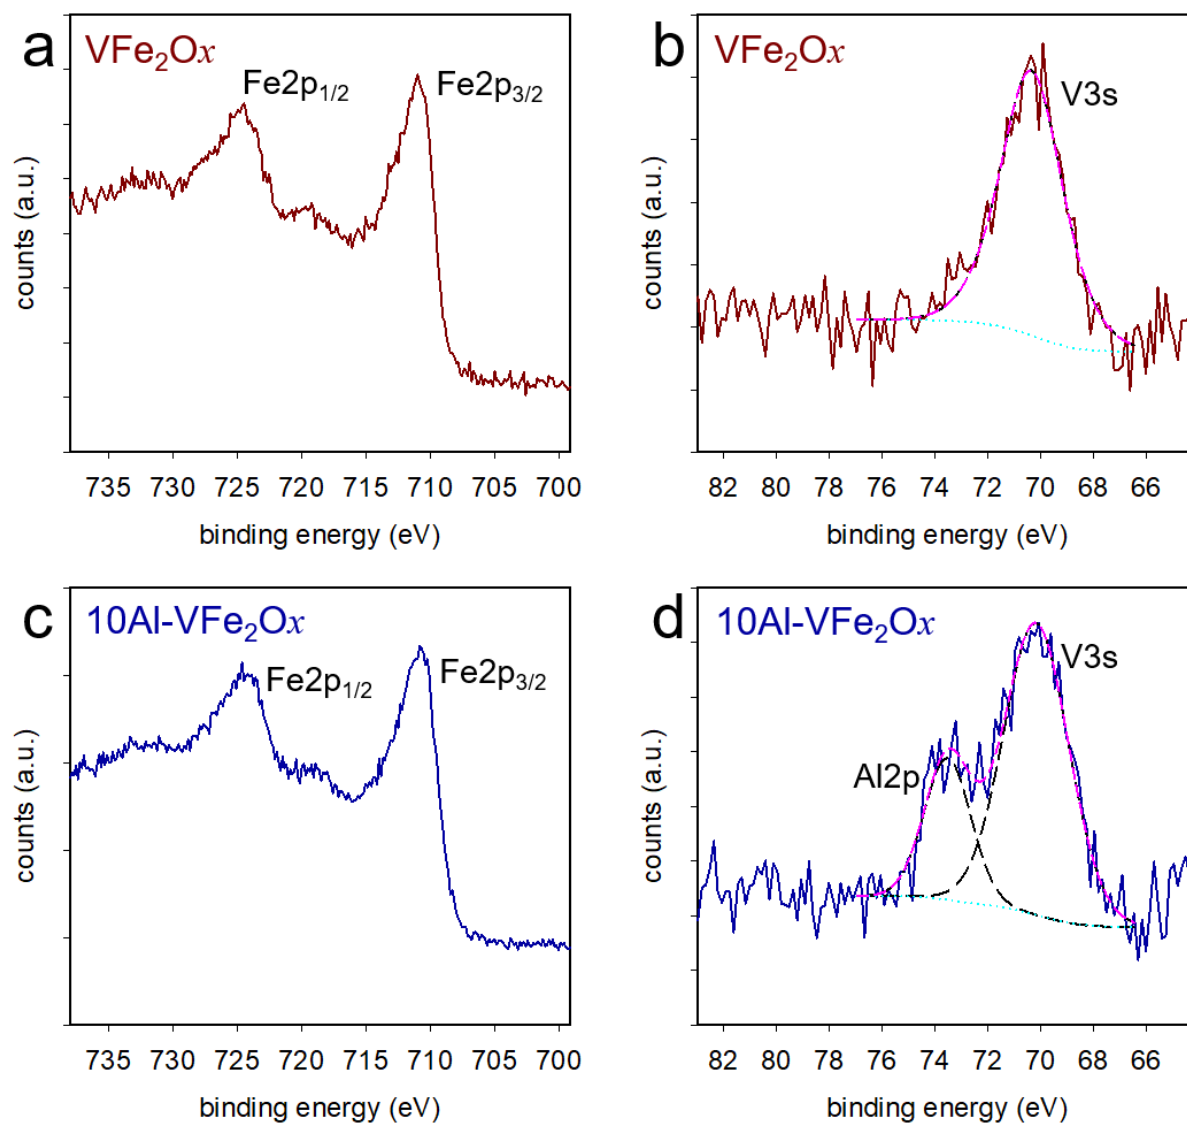

**Fig. S4.** X-ray photoelectron spectra of  $VFe_2O_x$  (a) Fe2p and (b) Al2p/V3s regions; and  $10Al-VFe_2O_x$  (c) Fe2p and (d) Al2p/V3s regions.

**Fig. S5**

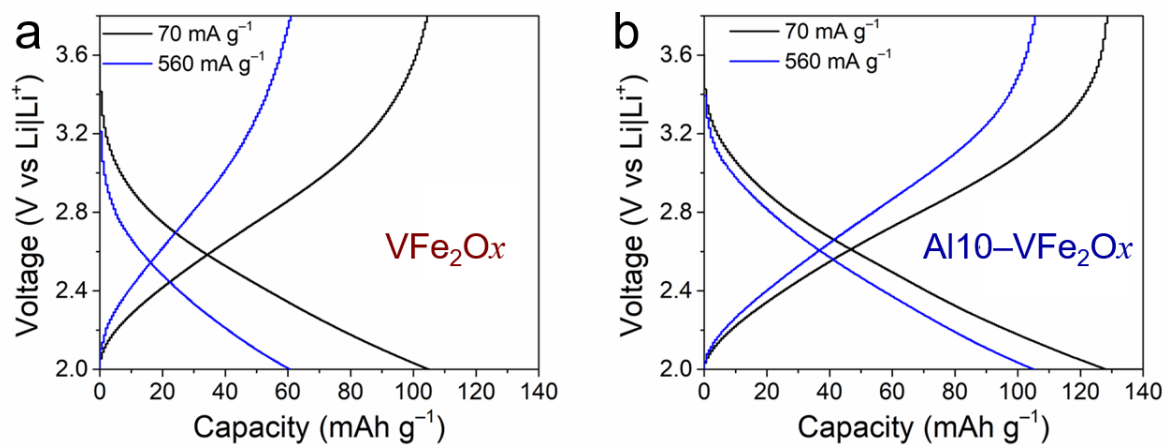

**Fig. S5.** Galvanostatic charge/discharge testing on both (a) VFe<sub>2</sub>O<sub>x</sub> and (b) 10Al-VFe<sub>2</sub>O<sub>x</sub> aerogels at 70 and 560 mA g<sup>-1</sup> with current density normalized to the mass of active material in the powder-composite electrode

**Fig. S6**

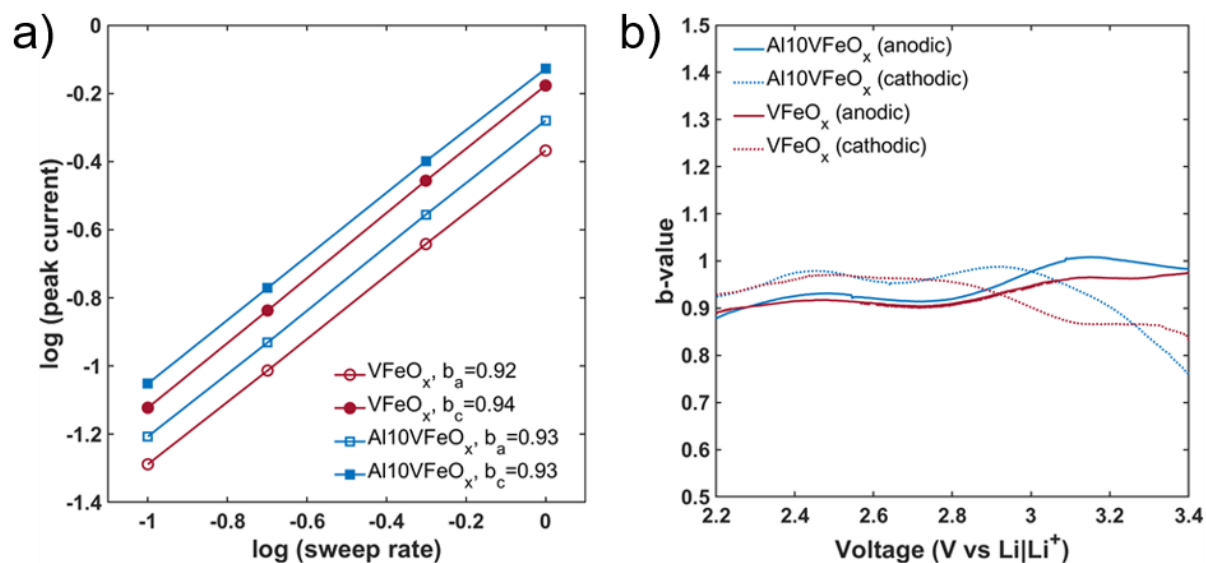

**Fig. S6.** (a) peak current b-value analysis for  $\text{V}_2\text{FeO}_x$  (red) and 10Al- $\text{VFeO}_x$  (blue) with both anodic (open markers) and cathodic (closed markers). Minimum  $R^2$  is 0.9999; (b) Variation in b-as a function of potential. The first and last 200mV removed for polarization discrepancies.

Diffusion analysis was performed by plotting the b-value across the entire potential window scanned. By processing the data in this way, voltammograms can still be fit to Equation 1 accurately in the absence of well-defined redox peaks. Polarization effects disrupt the analysis when changing sweep direction (i.e., switching from a cathodic sweep to an anodic one or vice versa), so the first and last 200 mV are removed from the analysis.

**Table S1.** Summary of N<sub>2</sub>-physisorption and elemental analysis results for VFe<sub>2</sub>O<sub>x</sub> and 10Al-VFe<sub>2</sub>O<sub>x</sub>

| Sample                               | BET<br>surface area<br>(m <sup>2</sup> g <sup>-1</sup> ) | BJH adsorption<br>pore volume<br>(cm <sup>3</sup> g <sup>-1</sup> ) | BJH adsorption<br>pore width<br>(nm) | Fe: Al+V<br>(atomic ratio) | % Al on V-site |
|--------------------------------------|----------------------------------------------------------|---------------------------------------------------------------------|--------------------------------------|----------------------------|----------------|
| VFe <sub>2</sub> O <sub>x</sub>      | 229                                                      | 3.4                                                                 | 62                                   | 2.2                        | 0              |
| 10Al-VFe <sub>2</sub> O <sub>x</sub> | 327                                                      | 3.7                                                                 | 51                                   | 2.0                        | 9.7            |



**Table S2.** Summary of galvanostatic charge–discharge first cycle efficiency and fifth cycle hysteresis for VFe<sub>2</sub>O<sub>x</sub> and 10Al-VFe<sub>2</sub>O<sub>x</sub>

| Sample                               | First Cycle Efficiency | Hysteresis*               | Hysteresis*                | Hysteresis <sup>Δ</sup>   | Hysteresis <sup>Δ</sup>    |
|--------------------------------------|------------------------|---------------------------|----------------------------|---------------------------|----------------------------|
|                                      |                        | 70 mA g <sup>-1</sup> (V) | 560 mA g <sup>-1</sup> (V) | 70 mA g <sup>-1</sup> (V) | 560 mA g <sup>-1</sup> (V) |
| VFe <sub>2</sub> O <sub>x</sub>      | 85%                    | 0.36                      | 1.1                        | 0.38                      | 0.52                       |
| 10Al-VFe <sub>2</sub> O <sub>x</sub> | 92%                    | 0.26                      | 0.66                       | 0.30                      | 0.35                       |

\*Calculated by dividing the total energy for either charge/discharge by the total capacity for the corresponding charge/discharge to obtain an average potential. Average voltage of discharge was then subtracted from the operating voltage for charge to calculate hysteresis.

<sup>Δ</sup>Calculated by subtracting the potential at 50% energy upon discharging from the potential at 50% energy upon charging.
